# Supplementary material
Source: ML conference proceedings conference paper supplement (https://openreview.net/forum?id=Cdhxv0Oz1v)
Supplement: supplementary_material [file attachment]

## A APPENDIX

This supplementary material presents additional details of Section 3.2, 4.1 and 4.2. It is organized as follows:

- **Detailed results for CIFAR-10 and CIFAR-100 benchmarks** We present detailed results on CIFAR-10 and CIFAR-100 benchmarks and compare with other competitive methods in Sec. 4.2.2.
- **Description of OOD datasets** We provide additional information about the OOD datasets used in our experiments in Sec. 4.1.
- **GradRect with different  $p$  value of  $L_p$  norm** We conduct an experimental study to evaluate the role of  $p$  value in  $L_p$  norm in Sec 3.2.

## B DETAILED RESULTS FOR CIFAR-10 AND CIFAR-100 BENCHMARKS

We report the detailed results on CIFAR-10 benchmark in Table 7 and CIFAR-100 benchmark in Table 8. For both tables, the results except for GradNorm and GradRect are in line with (Ahn et al., 2023).

Table 7: Comparison in OOD detection on CIFAR-10 benchmark. Backbone is DenseNet pretrained on CIFAR-10. Baseline methods include post-hoc methods (MSP Hendrycks & Gimpel (2016), ODIN Liang et al. (2018), Mahalanobis Lee et al. (2018), Free Energy Liu et al. (2020), ReAct Sun et al. (2021), DICE Sun & Li (2022) and GradNorm Huang et al. (2021)). All values in this table are percentages.  $\downarrow$  (or  $\uparrow$ ) indicates smaller (or larger) values are preferred.

| Method                        | SVHN               |                  | LSUN-c             |                  | LSUN-r             |                  | iSUN               |                  | Textures           |                  | Places365          |                  | Average            |                  |
|-------------------------------|--------------------|------------------|--------------------|------------------|--------------------|------------------|--------------------|------------------|--------------------|------------------|--------------------|------------------|--------------------|------------------|
|                               | FPR95 $\downarrow$ | AUROC $\uparrow$ |
| MSP Hendrycks & Gimpel (2016) | 47.24              | 93.48            | 33.57              | 95.54            | 42.10              | 94.51            | 42.31              | 94.52            | 64.15              | 88.15            | 63.02              | 88.57            | 48.73              | 92.46            |
| ODIN Liang et al. (2018)      | 25.29              | 94.57            | 4.70               | 98.86            | 3.09               | 99.02            | 3.98               | 98.90            | 57.50              | 82.38            | 52.85              | 88.55            | 24.57              | 93.71            |
| Mahalanobis Lee et al. (2018) | 6.42               | 98.31            | 56.55              | 86.96            | 9.14               | 97.09            | 9.78               | 97.25            | 21.51              | 92.15            | 85.14              | 63.15            | 31.42              | 89.15            |
| Energy Liu et al. (2020)      | 40.61              | 93.99            | 3.81               | 99.15            | 9.28               | 98.12            | 10.07              | 98.07            | 56.12              | 86.43            | 39.40              | 91.64            | 26.55              | 94.57            |
| ReAct Sun et al. (2021)       | 41.64              | 93.87            | 5.96               | 98.84            | 11.46              | 97.87            | 12.72              | 97.72            | 43.58              | 90.37            | 43.31              | 91.01            | 26.45              | 94.95            |
| DICE Sun & Li (2022)          | 25.99              | 95.90            | 0.26               | 99.92            | 3.91               | 99.20            | 4.36               | 99.14            | 41.90              | 88.18            | 48.59              | 89.13            | 20.83              | 95.24            |
| GradNorm Huang et al. (2021)  | 17.60              | 95.14            | 0.90               | 99.78            | 4.80               | 98.87            | 5.20               | 98.80            | 55.70              | 88.08            | 43.60              | 89.84            | 21.30              | 95.08            |
| GradRect                      | 13.00              | 96.17            | 0.30               | 99.88            | 4.90               | 99.12            | 7.30               | 98.17            | 50.00              | 89.24            | 43.20              | 89.88            | 19.78              | 95.41            |

Table 8: Comparison in OOD detection on CIFAR-100 benchmark. Backbone is DenseNet pretrained on CIFAR-100. Baseline methods include post-hoc methods (MSP Hendrycks & Gimpel (2016), ODIN Liang et al. (2018), Mahalanobis Lee et al. (2018), Free Energy Liu et al. (2020), ReAct Sun et al. (2021), DICE Sun & Li (2022) and GradNorm Huang et al. (2021)). All values in this table are percentages.  $\downarrow$  (or  $\uparrow$ ) indicates smaller (or larger) values are preferred.

| Method                        | SVHN               |                  | LSUN-c             |                  | LSUN-r             |                  | iSUN               |                  | Textures           |                  | Places365          |                  | Average            |                  |
|-------------------------------|--------------------|------------------|--------------------|------------------|--------------------|------------------|--------------------|------------------|--------------------|------------------|--------------------|------------------|--------------------|------------------|
|                               | FPR95 $\downarrow$ | AUROC $\uparrow$ |
| MSP Hendrycks & Gimpel (2016) | 81.70              | 75.40            | 60.49              | 85.60            | 85.24              | 69.18            | 85.99              | 70.17            | 84.79              | 71.48            | 82.55              | 74.31            | 80.13              | 74.36            |
| ODIN Liang et al. (2018)      | 41.35              | 92.65            | 10.54              | 97.93            | 65.22              | 84.22            | 67.05              | 83.84            | 82.34              | 71.48            | 82.32              | 76.84            | 58.14              | 84.49            |
| Mahalanobis Lee et al. (2018) | 22.44              | 95.67            | 68.90              | 86.30            | 23.07              | 94.20            | 31.38              | 93.21            | 62.39              | 79.39            | 92.66              | 61.39            | 55.37              | 82.73            |
| Energy Liu et al. (2020)      | 87.46              | 81.85            | 14.72              | 97.43            | 70.65              | 80.14            | 74.54              | 78.95            | 84.15              | 71.03            | 79.20              | 77.72            | 68.45              | 81.19            |
| ReAct Sun et al. (2021)       | 83.81              | 81.41            | 25.55              | 94.92            | 60.08              | 87.88            | 65.27              | 86.55            | 77.78              | 78.95            | 82.65              | 74.04            | 62.27              | 84.47            |
| DICE Sun & Li (2022)          | 54.65              | 88.84            | 0.93               | 99.74            | 49.40              | 91.04            | 48.72              | 90.08            | 65.04              | 76.42            | 79.58              | 77.26            | 49.72              | 87.23            |
| GradNorm Huang et al. (2021)  | 31.40              | 89.83            | 0.40               | 99.88            | 54.60              | 86.43            | 54.60              | 86.41            | 94.00              | 76.39            | 63.40              | 79.97            | 49.73              | 86.48            |
| GradRect                      | 30.20              | 89.63            | 0.60               | 99.85            | 33.80              | 91.93            | 29.40              | 91.58            | 94.20              | 74.76            | 65.00              | 77.87            | 42.20              | 87.60            |

## C DESCRIPTION OF OOD DATASETS

To ensure proper performance evaluation, we need to make sure that the OOD datasets don't contain samples with ID category. In experiments, for CIFAR-10 and CIFAR-100 benchmarks, we leverage commonly-used six OOD datasets for evaluation. Specifically, we employ Texture Cimpoi et al. (2014), SVHN Netzer et al. (2011), Places365 Zhou et al. (2017), LSUN-Crop Yu et al. (2015), LSUN-Resize Yu et al. (2015), and iSUN Xu et al. (2015). The detailed description of OOD datasets is listed below:

The Street View House Numbers (SVHN) dataset consists of images depicting house numbers. The dataset has ten categories corresponding to the digits 0-9. Places365 includes a collection of large-scale scene images classified into 365 distinct categories. The test set of this dataset consists of

900 images per category. LSUN consists of 10,000 images depicting scenes. Both LSUN-Crop and LSUN-Resize are the cropped and resized version of LSUN dataset respectively. iSUN is a large-scale eye-tracking dataset.

For the ImageNet case, we select four testsets from subsets of iNaturalist [Van Horn et al. \(2018\)](#), SUN [Xu et al. \(2015\)](#), Places365 [Zhou et al. \(2017\)](#), and Texture [Cimpoi et al. \(2014\)](#). The detailed description of them is listed below:

iNaturalist comprises a comprehensive collection of 859,000 images panning more than 5,000 distinct species of plants and animals. SUN and Places are scene datasets. Texture comprises a vast collection of 5,640 real-world texture images across 47 distinct categories. To ensure the validity of the evaluation process, in this research study, we leverage OOD datasets craft by [Huang & Li \(2021\)](#) with categories disjoint from the ImageNet-1k dataset.

## D GRADRECT WITH DIFFERENT P VALUE OF $L_p$ NORM

As stated in Sec 3.1, we choose  $p=2$  by default for  $L_p$  norm in GradRect score. For other choices of  $p$ , we conduct experiments with different  $p$  value of  $L_p$  norm in GradRect score and report the results using  $L_{1\sim 4}$ , the fraction norm  $L_{p=0.5}$  and  $L_\infty$  in Table 9.

Among all different  $p$  values considered, the  $L_1$  norm achieves the best performance due to the characteristic of  $L_1$  norm. Compared to other higher-order norms unfairly emphasizing dimensions while disregarding others,  $L_1$  norm can treat all dimensions in the gradient space equally when capturing information. Note that the extreme case  $L_\infty$  has the worst performance for the reason only the largest element is considered and all other information is ignored.

Table 9: Effect of different  $p$  value of  $L_p$  norm in GradRect score. The experiments are conducted on the ImageNet-1k benchmark.

| $L_p$ norm   | FPR95 ↓ | AUROC ↑ |
|--------------|---------|---------|
| $p = 0.5$    | 53.65   | 85.13   |
| $p = 1$      | 46.70   | 89.10   |
| $p = 2$      | 47.08   | 88.88   |
| $p = 3$      | 61.86   | 81.34   |
| $p = \infty$ | 79.57   | 75.31   |
